# Supplementary material
Source: PubMed Central journal article supplement (PMC8126473)
Supplement: hcv-14-e010413-s001.pdf [file hcv-14-e010413-s001.pdf]

## Supplementary Material

### Supplementary Tables

*Supplementary Table I: Baseline characteristics of the AVR+CABG cases included in pre-COVID-19 and during-COVID-19 groups, as defined in the methods section. AVR: Aortic Valve Replacement; CABG: coronary artery bypass graft. Note: this only included cases in February-November each year, and the numbers in some categories might not sum to the total due to missing data.*

|                                     | Pre-Covid-19     | During-Covid-19 | p-value |
|-------------------------------------|------------------|-----------------|---------|
| n                                   | 6216             | 980             |         |
| Age, years (mean (SD))              | 72.46 (8.17)     | 71.03 (8.49)    | <0.001  |
| Female (%)                          | 1400 (22.5)      | 186 (19.0)      | 0.014   |
| CCS Angina status (%)               |                  |                 | <0.001  |
| No angina                           | 1847 (29.8)      | 287 (29.3)      |         |
| Class I                             | 645 (10.4)       | 85 ( 8.7)       |         |
| Class II                            | 2214 (35.8)      | 313 (32.0)      |         |
| Class III or IV                     | 1483 (24.0)      | 294 (30.0)      |         |
| NYHA (%)                            |                  |                 | <0.001  |
| Class I                             | 658 (10.7)       | 92 ( 9.5)       |         |
| Class II                            | 2622 (42.8)      | 350 (36.1)      |         |
| Class III or IV                     | 2848 (46.5)      | 527 (54.4)      |         |
| Previous MI (%)                     | 1546 (25.0)      | 254 (25.9)      | 0.551   |
| Previous PCI (%)                    | 706 (11.5)       | 97 (10.0)       | 0.176   |
| Previous Cardiac Surgery (%)        | 153 ( 2.6)       | 18 ( 2.1)       | 0.371   |
| Diabetic (%)                        | 1825 (29.5)      | 275 (28.1)      | 0.404   |
| Current/Ex-Smoker (%)               | 3822 (61.9)      | 580 (59.4)      | 0.140   |
| Creatinine, umol/L (mean (SD))      | 95.93<br>(54.61) | 96.69 (54.82)   | 0.688   |
| History of neurological disease (%) | 639 (10.3)       | 102 (10.5)      | 0.923   |

|                                                    |                  |               |        |
|----------------------------------------------------|------------------|---------------|--------|
| Extracardiac Arteriopathy (%)                      | 842 (13.6)       | 132 (13.5)    | 1.000  |
| Atrial Fibrillation or Flutter (%)                 | 851 (13.7)       | 108 (11.3)    | 0.043  |
| One or more vessel with >50% diameter stenosis (%) | 5472 (96.8)      | 811 (96.4)    | 0.592  |
| PA Systolic (mean (SD))                            | 28.19<br>(22.05) | 32.42 (22.04) | 0.014  |
| LV Function (%)                                    |                  |               | 0.205  |
| Good (LVEF > 50%)                                  | 4427 (71.7)      | 675 (69.4)    |        |
| Moderate (LVEF 31 - 50%)                           | 1390 (22.5)      | 244 (25.1)    |        |
| Poor (LVEF < 30%)                                  | 360 ( 5.8)       | 54 ( 5.5)     |        |
| Height, m (mean (SD))                              | 1.70 (0.09)      | 1.71 (0.10)   | <0.001 |
| Weight, kg (mean (SD))                             | 83.36<br>(16.54) | 85.28 (17.68) | 0.001  |
| Non-Elective (%)                                   | 1873 (30.1)      | 379 (38.7)    | <0.001 |
| Logistic EuroSCORE (mean (SD))                     | 10.71<br>(11.15) | 10.48 (11.24) | 0.557  |

*Supplementary Table II: Baseline characteristics of the AVR+Other cases included in pre-COVID-19 and during-COVID-19 groups, as defined in the methods section. AVR: Aortic Valve Replacement. Note: this only included cases in February-November each year, and the numbers in some categories might not sum to the total due to missing data.*

|                                                    | Pre-Covid-19  | During-Covid-19 | p-value |
|----------------------------------------------------|---------------|-----------------|---------|
| n                                                  | 4684          | 1068            |         |
| Age, years (mean (SD))                             | 63.01 (14.10) | 62.37 (14.04)   | 0.183   |
| Female (%)                                         | 1620 (34.6)   | 315 (29.5)      | 0.002   |
| CCS Angina status (%)                              |               |                 | 0.052   |
| No angina                                          | 3121 (66.8)   | 700 (65.7)      |         |
| Class I                                            | 518 (11.1)    | 97 (9.1)        |         |
| Class II                                           | 669 (14.3)    | 167 (15.7)      |         |
| Class III or IV                                    | 365 (7.8)     | 102 (9.6)       |         |
| NYHA (%)                                           |               |                 | <0.001  |
| Class I                                            | 709 (15.4)    | 198 (18.8)      |         |
| Class II                                           | 1660 (36.1)   | 292 (27.8)      |         |
| Class III or IV                                    | 2235 (48.5)   | 562 (53.4)      |         |
| Previous MI (%)                                    | 222 (4.8)     | 58 (5.5)        | 0.389   |
| Previous PCI (%)                                   | 156 (3.4)     | 34 (3.2)        | 0.859   |
| Previous Cardiac Surgery (%)                       | 648 (14.9)    | 139 (14.2)      | 0.617   |
| Diabetic (%)                                       | 550 (11.8)    | 122 (11.4)      | 0.810   |
| Current/Ex-Smoker (%)                              | 2327 (50.0)   | 509 (48.1)      | 0.265   |
| Creatinine, umol/L (mean (SD))                     | 95.74 (57.46) | 95.81 (56.85)   | 0.973   |
| History of neurological disease (%)                | 459 (9.9)     | 123 (11.6)      | 0.097   |
| Extracardiac Arteriopathy (%)                      | 355 (7.6)     | 64 (6.0)        | 0.084   |
| Atrial Fibrillation or Flutter (%)                 | 1124 (24.2)   | 252 (24.1)      | 0.963   |
| One or more vessel with >50% diameter stenosis (%) | 191 (5.1)     | 39 (4.7)        | 0.655   |
| PA Systolic (mean (SD))                            | 38.57 (21.91) | 39.75 (22.51)   | 0.434   |
| LV Function (%)                                    |               |                 | 0.521   |
| Good (LVEF > 50%)                                  | 3311 (71.3)   | 739 (69.5)      |         |
| Moderate (LVEF 31 - 50%)                           | 1056 (22.7)   | 255 (24.0)      |         |

|                                |                  |               |        |
|--------------------------------|------------------|---------------|--------|
| Poor (LVEF < 30%)              | 279 ( 6.0)       | 69 ( 6.5)     |        |
| Height, m (mean (SD))          | 1.70 (0.11)      | 1.71 (0.11)   | 0.008  |
| Weight, kg (mean (SD))         | 82.00<br>(18.69) | 83.90 (20.56) | 0.003  |
| Non-Elective (%)               | 1518 (32.4)      | 435 (40.7)    | <0.001 |
| Logistic EuroSCORE (mean (SD)) | 14.05<br>(14.55) | 13.92 (14.04) | 0.787  |

*Supplementary Table III: Baseline characteristics of the Isolated AVR cases included in the pre-COVID-19 (2019 only) and during-COVID-19 groups, as defined in the methods section. AVR: Aortic Valve Replacement. Note: this only included cases in February-November each year, and the numbers in some categories might not sum to the total due to missing data.*

|                                                    | Pre-Covid-19  | During-Covid-19 | p-value |
|----------------------------------------------------|---------------|-----------------|---------|
| n                                                  | 3271          | 1549            |         |
| Age, years (mean (SD))                             | 67.44 (11.57) | 66.05 (11.22)   | <0.001  |
| Female (%)                                         | 1196 (36.6)   | 539 (34.8)      | 0.245   |
| CCS Angina status (%)                              |               |                 | 0.136   |
| No angina                                          | 1955 (59.9)   | 895 (57.9)      |         |
| Class I                                            | 378 (11.6)    | 175 (11.3)      |         |
| Class II                                           | 627 (19.2)    | 299 (19.3)      |         |
| Class III or IV                                    | 306 ( 9.4)    | 178 (11.5)      |         |
| NYHA (%)                                           |               |                 | 0.003   |
| Class I                                            | 308 ( 9.6)    | 138 ( 9.0)      |         |
| Class II                                           | 1230 (38.1)   | 512 (33.5)      |         |
| Class III or IV                                    | 1687 (52.3)   | 878 (57.5)      |         |
| Previous MI (%)                                    | 194 ( 6.0)    | 77 ( 5.0)       | 0.198   |
| Previous PCI (%)                                   | 155 ( 4.8)    | 80 ( 5.2)       | 0.597   |
| Previous Cardiac Surgery (%)                       | 227 ( 7.5)    | 116 ( 8.1)      | 0.498   |
| Diabetic (%)                                       | 585 (17.9)    | 334 (21.6)      | 0.003   |
| Current/Ex-Smoker (%)                              | 1748 (53.9)   | 800 (52.2)      | 0.281   |
| Creatinine, umol/L (mean (SD))                     | 89.72 (47.15) | 89.12 (47.34)   | 0.685   |
| History of neurological disease (%)                | 297 ( 9.1)    | 123 ( 8.0)      | 0.215   |
| Extracardiac Arteriopathy (%)                      | 165 ( 5.1)    | 72 ( 4.7)       | 0.600   |
| Atrial Fibrillation or Flutter (%)                 | 295 ( 9.1)    | 100 ( 6.6)      | 0.004   |
| One or more vessel with >50% diameter stenosis (%) | 138 ( 4.8)    | 78 ( 5.9)       | 0.153   |
| PA Systolic (mean (SD))                            | 26.69 (17.23) | 32.75 (26.93)   | <0.001  |
| LV Function (%)                                    |               |                 | 0.285   |
| Good (LVEF > 50%)                                  | 2605 (80.2)   | 1206 (78.3)     |         |
| Moderate (LVEF 31 - 50%)                           | 490 (15.1)    | 259 (16.8)      |         |

|                                |                  |               |        |
|--------------------------------|------------------|---------------|--------|
| Poor (LVEF < 30%)              | 154 ( 4.7)       | 75 ( 4.9)     |        |
| Height, m (mean (SD))          | 1.69 (0.10)      | 1.70 (0.11)   | 0.064  |
| Weight, kg (mean (SD))         | 83.23<br>(18.22) | 84.53 (19.60) | 0.024  |
| Non-Elective (%)               | 697 (21.3)       | 462 (29.8)    | <0.001 |
| Logistic EuroSCORE (mean (SD)) | 7.29 (8.30)      | 6.98 (8.73)   | 0.226  |

*Supplementary Table IV: Baseline characteristics of the AVR+CABG cases included in pre-COVID-19 (2019 only) and during-COVID-19 groups, as defined in the methods section. AVR: Aortic Valve Replacement; CABG: coronary artery bypass graft. Note: this only included cases in February-November each year, and the numbers in some categories might not sum to the total due to missing data.*

|                                                    | Pre-Covid-19     | During-Covid-19 | p-value |
|----------------------------------------------------|------------------|-----------------|---------|
| n                                                  | 2006             | 980             |         |
| Age, years (mean (SD))                             | 72.40 (7.92)     | 71.03 (8.49)    | <0.001  |
| Female (%)                                         | 427 (21.3)       | 186 (19.0)      | 0.156   |
| CCS Angina status (%)                              |                  |                 | 0.029   |
| No angina                                          | 615 (30.7)       | 287 (29.3)      |         |
| Class I                                            | 219 (10.9)       | 85 ( 8.7)       |         |
| Class II                                           | 658 (32.9)       | 313 (32.0)      |         |
| Class III or IV                                    | 509 (25.4)       | 294 (30.0)      |         |
| NYHA (%)                                           |                  |                 | 0.020   |
| Class I                                            | 208 (10.5)       | 92 ( 9.5)       |         |
| Class II                                           | 801 (40.6)       | 350 (36.1)      |         |
| Class III or IV                                    | 965 (48.9)       | 527 (54.4)      |         |
| Previous MI (%)                                    | 477 (23.9)       | 254 (25.9)      | 0.244   |
| Previous PCI (%)                                   | 249 (12.5)       | 97 (10.0)       | 0.047   |
| Previous Cardiac Surgery (%)                       | 55 ( 2.9)        | 18 ( 2.1)       | 0.228   |
| Diabetic (%)                                       | 603 (30.1)       | 275 (28.1)      | 0.268   |
| Current/Ex-Smoker (%)                              | 1211 (60.6)      | 580 (59.4)      | 0.541   |
| Creatinine, umol/L (mean (SD))                     | 93.41<br>(41.27) | 96.69 (54.82)   | 0.072   |
| History of neurological disease (%)                | 219 (10.9)       | 102 (10.5)      | 0.768   |
| Extracardiac Arteriopathy (%)                      | 240 (12.0)       | 132 (13.5)      | 0.260   |
| Atrial Fibrillation or Flutter (%)                 | 295 (14.8)       | 108 (11.3)      | 0.011   |
| One or more vessel with >50% diameter stenosis (%) | 1777 (96.8)      | 811 (96.4)      | 0.667   |
| PA Systolic (mean (SD))                            | 27.76<br>(21.62) | 32.42 (22.04)   | 0.015   |
| LV Function (%)                                    |                  |                 | 0.465   |
| Good (LVEF > 50%)                                  | 1423 (71.2)      | 675 (69.4)      |         |
| Moderate (LVEF 31 - 50%)                           | 460 (23.0)       | 244 (25.1)      |         |

|                                |                  |               |        |
|--------------------------------|------------------|---------------|--------|
| Poor (LVEF < 30%)              | 115 ( 5.8)       | 54 ( 5.5)     |        |
| Height, m (mean (SD))          | 1.70 (0.10)      | 1.71 (0.10)   | <0.001 |
| Weight, kg (mean (SD))         | 83.65<br>(16.61) | 85.28 (17.68) | 0.014  |
| Non-Elective (%)               | 609 (30.4)       | 379 (38.7)    | <0.001 |
| Logistic EuroSCORE (mean (SD)) | 10.57<br>(11.43) | 10.48 (11.24) | 0.837  |



*Supplementary Table V: Baseline characteristics of the AVR+Other cases included in pre-COVID-19 (2019 only) and during-COVID-19 groups, as defined in the methods section. AVR: Aortic Valve Replacement. Note: this only included cases in February-November each year, and the numbers in some categories might not sum to the total due to missing data.*

|                                                    | Pre-Covid-19  | During-Covid-19 | p-value |
|----------------------------------------------------|---------------|-----------------|---------|
| n                                                  | 1638          | 1068            |         |
| Age, years (mean (SD))                             | 63.16 (13.91) | 62.37 (14.04)   | 0.150   |
| Female (%)                                         | 538 (32.8)    | 315 (29.5)      | 0.073   |
| CCS Angina status (%)                              |               |                 | 0.335   |
| No angina                                          | 1105 (67.5)   | 700 (65.7)      |         |
| Class I                                            | 166 (10.1)    | 97 (9.1)        |         |
| Class II                                           | 222 (13.6)    | 167 (15.7)      |         |
| Class III or IV                                    | 145 (8.9)     | 102 (9.6)       |         |
| NYHA (%)                                           |               |                 | <0.001  |
| Class I                                            | 258 (16.0)    | 198 (18.8)      |         |
| Class II                                           | 561 (34.9)    | 292 (27.8)      |         |
| Class III or IV                                    | 789 (49.1)    | 562 (53.4)      |         |
| Previous MI (%)                                    | 64 (3.9)      | 58 (5.5)        | 0.077   |
| Previous PCI (%)                                   | 53 (3.3)      | 34 (3.2)        | 1.000   |
| Previous Cardiac Surgery (%)                       | 229 (15.1)    | 139 (14.2)      | 0.611   |
| Diabetic (%)                                       | 189 (11.6)    | 122 (11.4)      | 0.981   |
| Current/Ex-Smoker (%)                              | 799 (49.1)    | 509 (48.1)      | 0.624   |
| Creatinine, umol/L (mean (SD))                     | 96.31 (54.06) | 95.81 (56.85)   | 0.820   |
| History of neurological disease (%)                | 159 (9.8)     | 123 (11.6)      | 0.136   |
| Extracardiac Arteriopathy (%)                      | 122 (7.5)     | 64 (6.0)        | 0.169   |
| Atrial Fibrillation or Flutter (%)                 | 389 (24.1)    | 252 (24.1)      | 1.000   |
| One or more vessel with >50% diameter stenosis (%) | 54 (4.0)      | 39 (4.7)        | 0.511   |
| PA Systolic (mean (SD))                            | 37.55 (21.64) | 39.75 (22.51)   | 0.204   |
| LV Function (%)                                    |               |                 | 0.942   |
| Good (LVEF > 50%)                                  | 1126 (69.4)   | 739 (69.5)      |         |
| Moderate (LVEF 31 - 50%)                           | 396 (24.4)    | 255 (24.0)      |         |

|                                |                  |               |        |
|--------------------------------|------------------|---------------|--------|
| Poor (LVEF < 30%)              | 101 ( 6.2)       | 69 ( 6.5)     |        |
| Height, m (mean (SD))          | 1.71 (0.12)      | 1.71 (0.11)   | 0.159  |
| Weight, kg (mean (SD))         | 83.11<br>(19.55) | 83.90 (20.56) | 0.313  |
| Non-Elective (%)               | 551 (33.6)       | 435 (40.7)    | <0.001 |
| Logistic EuroSCORE (mean (SD)) | 14.31<br>(14.42) | 13.92 (14.04) | 0.483  |

*Supplementary Table VI: Baseline characteristics of the TAVR cases included in pre-COVID-19 (2019 only) and during-COVID-19 groups, as defined in the methods section. AVR: Aortic Valve Replacement. Note: this only included cases in February-November each year, and the numbers in some categories might not sum to the total due to missing data.*

|                                                    | Pre-Covid-19      | During-Covid-19 | p-value |
|----------------------------------------------------|-------------------|-----------------|---------|
| n                                                  | 3868              | 2922            |         |
| Age, years (mean (SD))                             | 81.24 (7.18)      | 80.78 (7.06)    | 0.009   |
| Female (%)                                         | 1736 (44.9)       | 1278 (43.7)     | 0.336   |
| CCS Angina status (%)                              |                   |                 | 0.149   |
| No angina                                          | 2657 (75.3)       | 2043 (76.5)     |         |
| Class I                                            | 293 ( 8.3)        | 182 ( 6.8)      |         |
| Class II                                           | 407 (11.5)        | 323 (12.1)      |         |
| Class III or IV                                    | 171 ( 4.8)        | 122 ( 4.6)      |         |
| NYHA (%)                                           |                   |                 | <0.001  |
| Class I                                            | 234 ( 6.6)        | 246 ( 9.1)      |         |
| Class II                                           | 915 (25.8)        | 532 (19.7)      |         |
| Class III or IV                                    | 2402 (67.6)       | 1925 (71.2)     |         |
| Previous MI (%)                                    | 520 (14.3)        | 314 (11.6)      | 0.002   |
| Previous PCI (%)                                   | 593 (16.8)        | 401 (14.9)      | 0.042   |
| Previous Cardiac Surgery (%)                       | 572 (16.3)        | 403 (14.8)      | 0.108   |
| Diabetic (%)                                       | 900 (25.1)        | 663 (24.6)      | 0.666   |
| Current/Ex-Smoker (%)                              | 1586 (48.5)       | 1079 (45.0)     | 0.010   |
| Creatinine, umol/L (mean (SD))                     | 105.68<br>(64.15) | 103.09 (61.96)  | 0.117   |
| History of neurological disease (%)                | 574 (15.8)        | 405 (14.9)      | 0.346   |
| Extracardiac Arteriopathy (%)                      | 398 (11.2)        | 302 (11.3)      | 1.000   |
| Atrial Fibrillation or Flutter (%)                 | 956 (27.1)        | 760 (29.6)      | 0.033   |
| One or more vessel with >50% diameter stenosis (%) | 962 (30.8)        | 679 (28.1)      | 0.032   |
| PA Systolic (mean (SD))                            | 36.57 (15.36)     | 37.46 (14.89)   | 0.146   |
| LV Function (%)                                    |                   |                 | 0.051   |
| Good (LVEF > 50%)                                  | 2645 (74.3)       | 1915 (72.7)     |         |
| Moderate (LVEF 31 - 50%)                           | 617 (17.3)        | 451 (17.1)      |         |
| Poor (LVEF < 30%)                                  | 298 ( 8.4)        | 268 (10.2)      |         |

|                         |               |               |        |
|-------------------------|---------------|---------------|--------|
| Height, m (mean (SD))   | 1.65 (0.10)   | 1.66 (0.10)   | 0.001  |
| Weight, kg (mean (SD))  | 76.15 (17.80) | 77.11 (17.47) | 0.035  |
| Non-Elective (%)        | 710 (18.4)    | 758 (25.9)    | <0.001 |
| UK TAVR CPM (mean (SD)) | 2.90 (2.01)   | 2.96 (1.95)   | 0.231  |

## Supplementary Figures

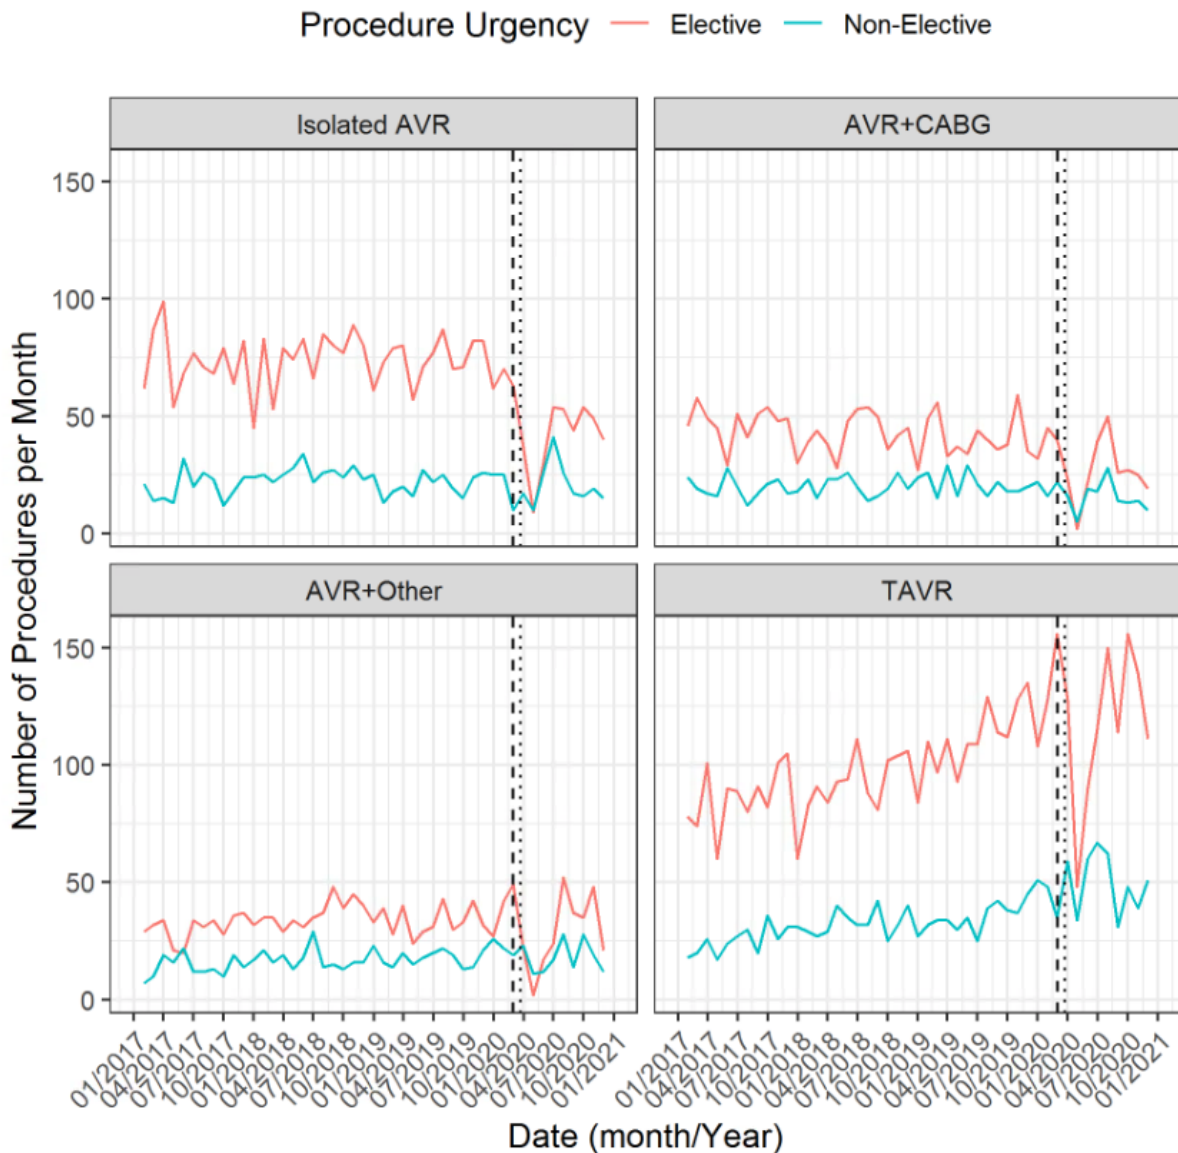

*Supplementary Figure I: Sensitivity analysis subletting on only the centres that submitted data rapidly (defined as submitting at least one case in November 2020, given this was latest month of analysis). Temporal plot of the number of TAVR and SAVR procedures per month, stratified according to procedure urgency. The vertical dotted line denotes 23rd March 2020 (date of UK lockdown) with 1st March denoted by the vertical dashed line. TAVR: Transcatheter Aortic Valve Replacement; SAVR: Surgical Aortic Valve Replacement.*

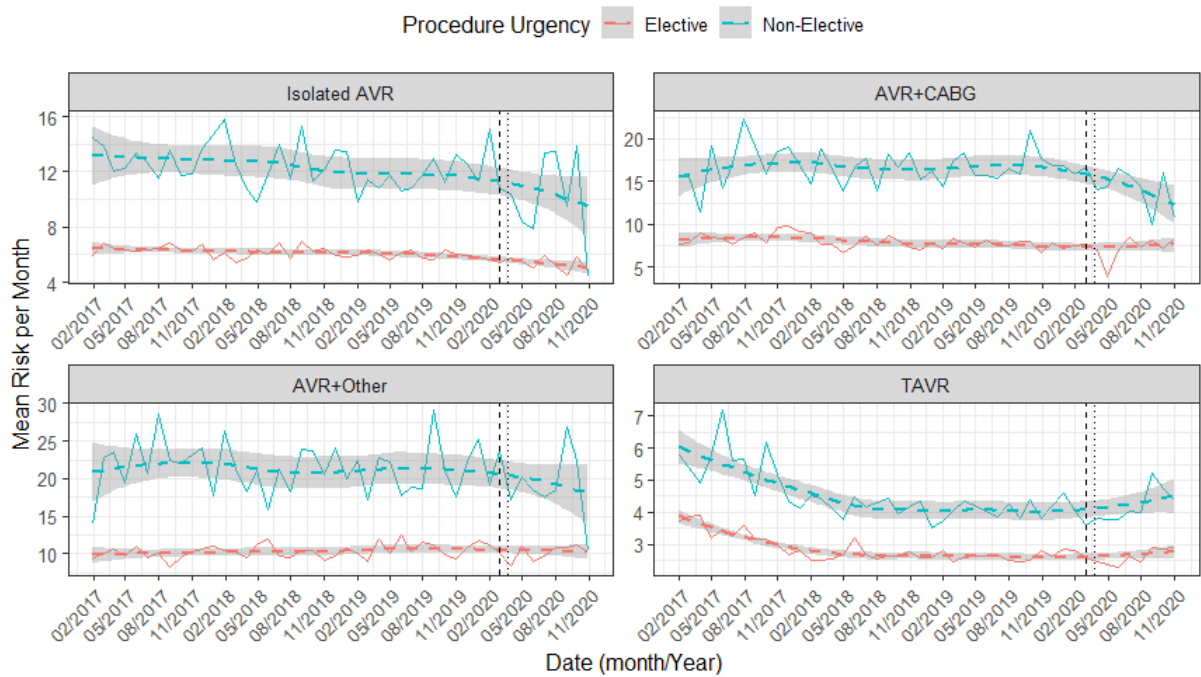

*Supplementary Figure II: Temporal plot of the mean procedural risk in each month (Logistic EuroSCORE for AVR, and UK TAVR prediction model for TAVR cases). The vertical dotted line denotes 23rd March 2020 (date of UK lockdown) with 1st March denoted by the vertical dashed line. TAVR: Transcatheter Aortic Valve Replacement; SAVR: Surgical Aortic Valve Replacement.*

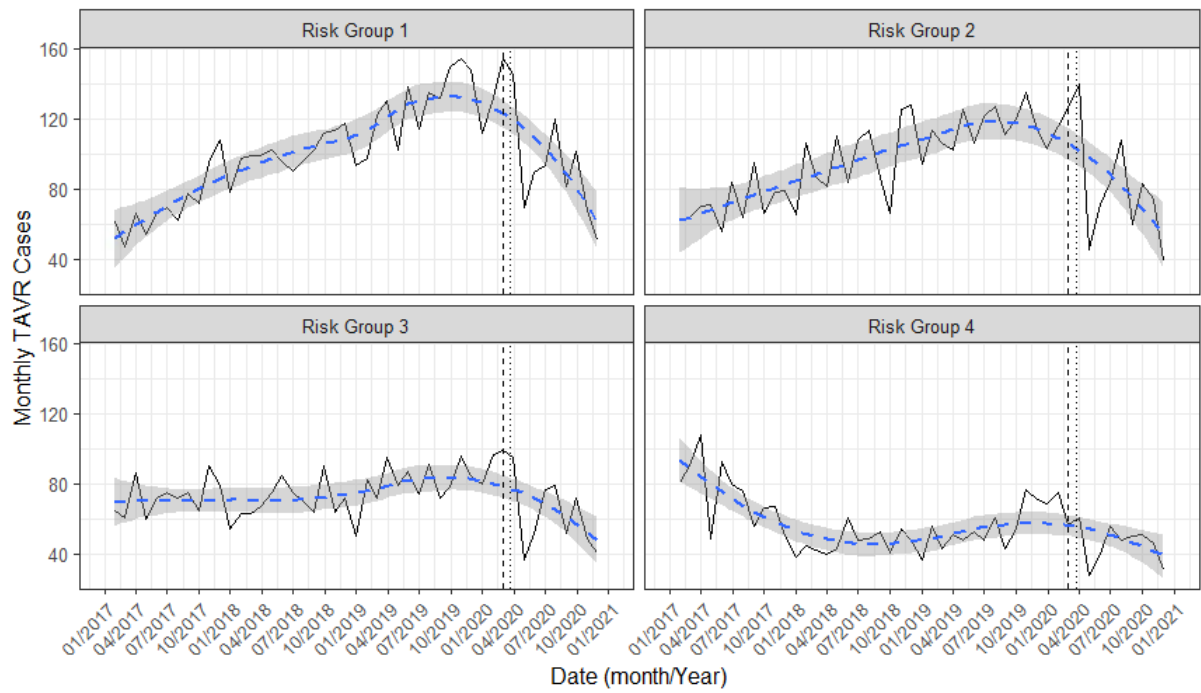

*Supplementary Figure III: Temporal plot of the number of TAVR procedures per month stratified by quantile of risk according to the UK TAVR prediction model. Risk groups were derived based on the quantiles of the first year of data. The dashed line represents a loess smoother through the data. TAVR: Transcatheter Aortic Valve Replacement.*

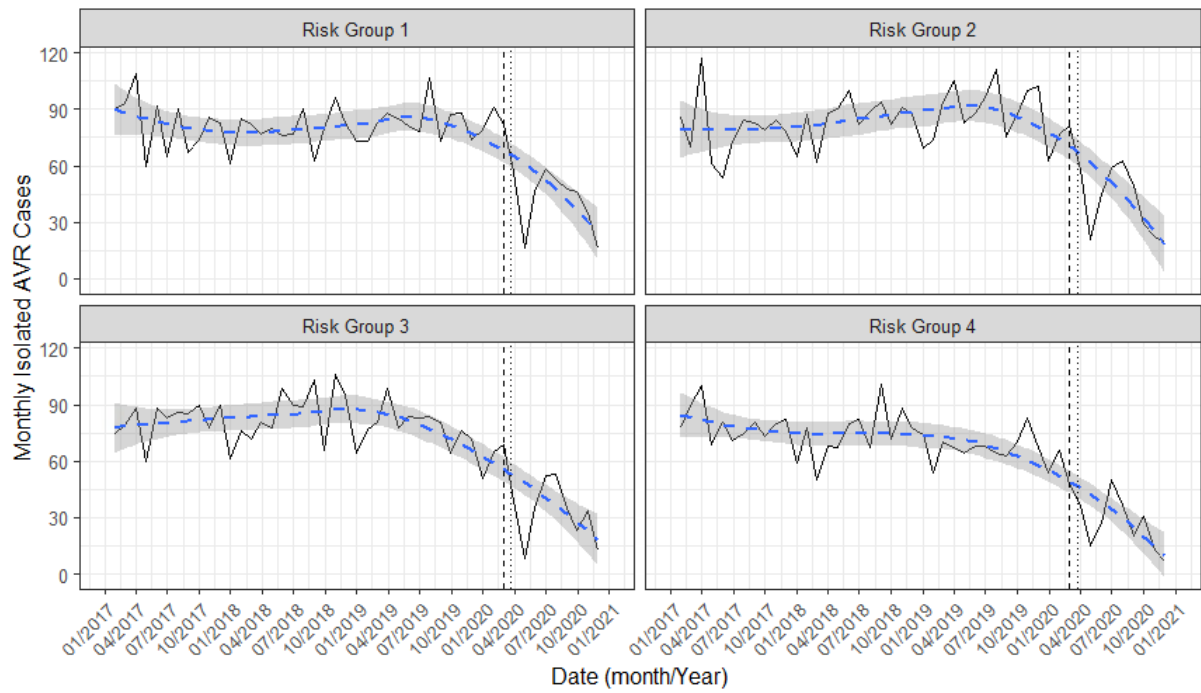

*Supplementary Figure IV: Temporal plot of the number of Isolated AVR procedures per month stratified by quantile of risk according to the Logistic EuroSCORE. Risk groups were derived based on the quantiles of the first year of data. The dashed line represents a loess smoother through the data. AVR: Surgical Aortic Valve Replacement.*



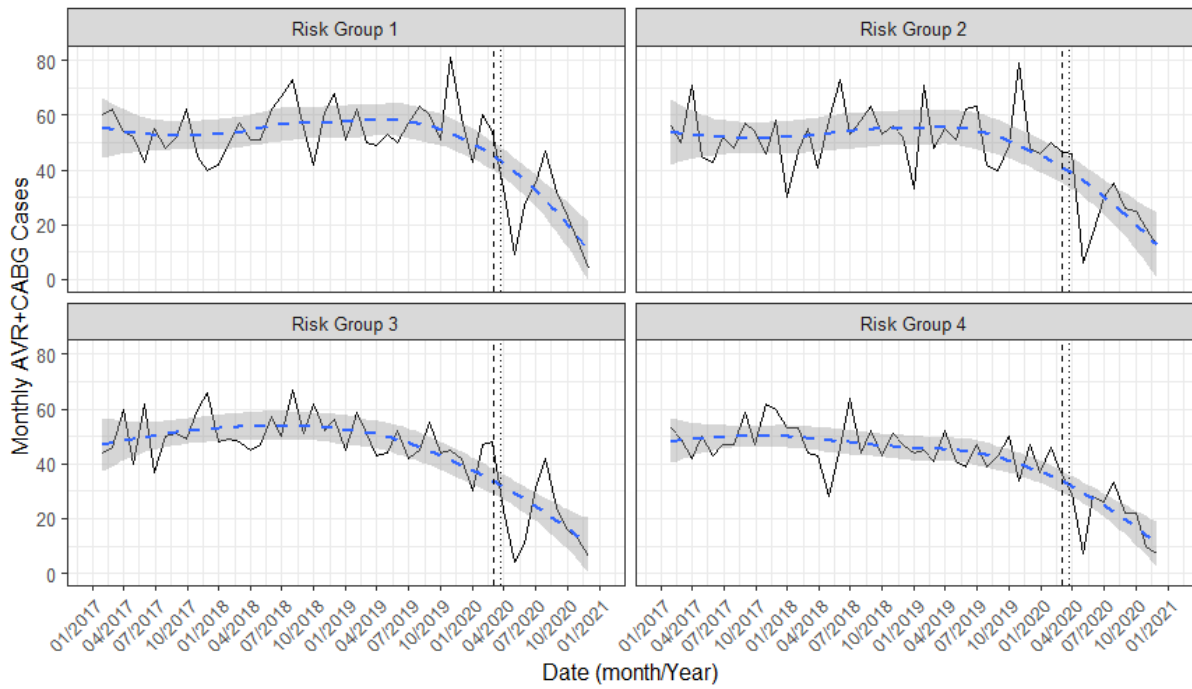

*Supplementary Figure V: Temporal plot of the number of AVR+CABG procedures per month stratified by quantile of risk according to the Logistic EuroSCORE. Risk groups were derived based on the quantiles of the first year of data. The dashed line represents a loess smoother through the data. AVR: Aortic Valve Replacement; CABG: coronary artery bypass graft.*

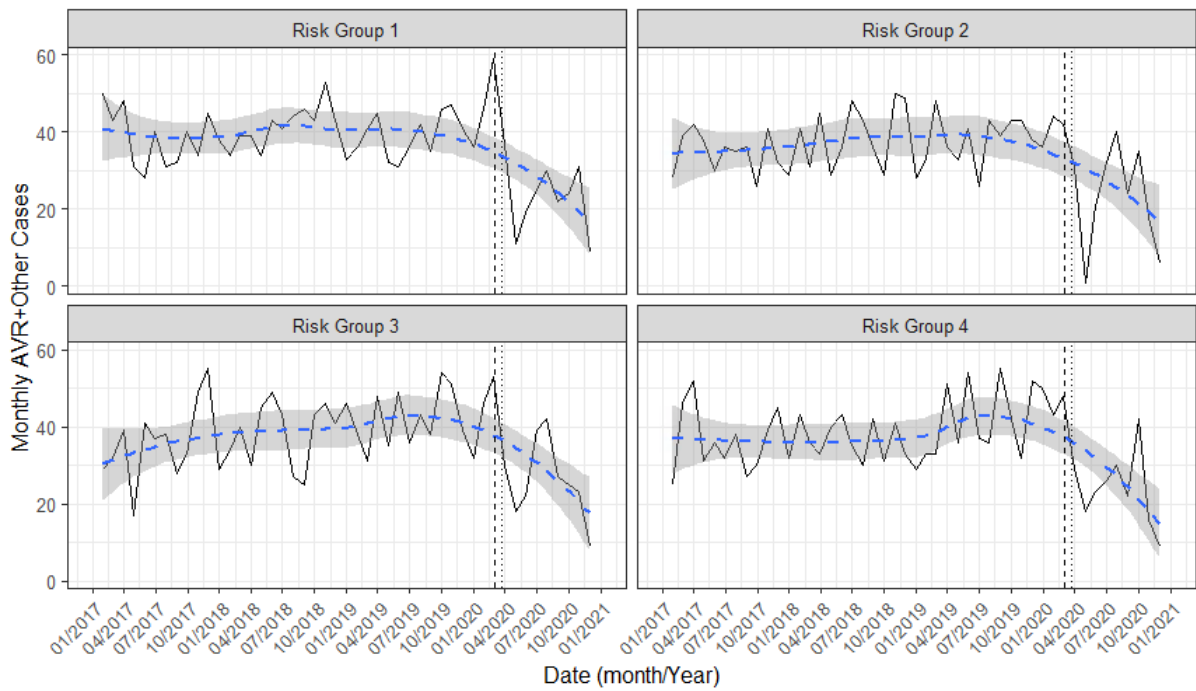

*Supplementary Figure VI: Temporal plot of the number of AVR+Other procedures per month stratified by quantile of risk according to the Logistic EuroSCORE. Risk groups were derived based on the quantiles of the first year of data. The dashed line represents a loess smoother through the data. AVR: Aortic Valve Replacement.*
